# Supplementary material for: Oxygen-incorporated crystalline/amorphous heterophase cobalt vanadium selenide nanoplates with dense interfacial sites for robust lithium–sulfur batteries
Source: Royal Society of Chemistry journal article supplement (doi:10.1039/d3ta07189h), 2024-01-01
Supplement: d3ta07189h1.pdf [file d3ta07189h1.pdf]

## Supporting Information

### **Oxygen-incorporated crystalline/amorphous heterophase cobalt vanadium selenide nanoplates with dense interfacial sites for robust lithium-sulfur batteries**

*Pengcheng Tan,<sup>a</sup> Yuan Yin,<sup>a</sup> Daoping Cai,<sup>a\*</sup> Ban Fei,<sup>a</sup> Chaoqi Zhang,<sup>a</sup> Qidi Chen,<sup>a\*</sup>  
and Hongbing Zhan<sup>a</sup>*

<sup>a</sup>College of Materials Science and Engineering, Fuzhou University, Fujian 350108, China.

\*Corresponding authors: Daoping Cai and Qidi Chen.

E-mail addresses: [dpcai@fzu.edu.cn](mailto:dpcai@fzu.edu.cn) and [chenqidi596@fzu.edu.cn](mailto:chenqidi596@fzu.edu.cn).

## **Experimental Section**

### **Synthesis of $\text{Co}_2\text{V}_2\text{O}_7 \cdot x\text{H}_2\text{O}$ NPs**

In a typical synthesis procedure, 0.234 g of  $\text{NH}_4\text{VO}_3$  was dissolved into 40 mL deionized water at 70 °C and maintained at this temperature with incessant stirring. After forming a canary yellow solution, 0.095 g of  $\text{CoCl}_2 \cdot 6\text{H}_2\text{O}$  and 1.2 g of hexamethylenetetramine (HMTA) were added into the solution successively with incessant stirring for 4 h at 80 °C. After cooling to room temperature, the orange precipitates were collected by centrifuging and then rinsed with distilled water and absolute ethanol several times. The samples were dried at 70 °C for 12 h in the air.

### **Synthesis of DC/A O-CoVSe NPs and SC/A O-CoVSe NPs**

In a typical preparation, 0.095 g of Se, 0.228 g of  $\text{NaBH}_4$ , 0.08 g of NaOH and 0.02 g of  $\text{Co}_2\text{V}_2\text{O}_7 \cdot x\text{H}_2\text{O}$  NPs were added in 30 mL of deionized water by magnetic agitation for 30 min. Afterward, the solution was transferred to a 40 mL autoclave. Subsequently, the autoclave was maintained at 120 °C for 6 h. After cooling to room temperature, the material was washed repeatedly with deionized water and ethanol, then dried at 70 °C for 12 h. SC/A O-CoVSe NPs went through the same process by changing the selenization temperature to 160 °C.

### **Synthesis of modified separators**

The DC/A O-CoVSe NPs and SC/A O-CoVSe NPs modified separators (DC/A O-CoVSe NPs/PP and SC/A O-CoVSe NPs/PP) were prepared through a simple vacuum filtration method. In short, DC/A O-CoVSe NPs (4.2 mg) was ultrasonically dispersed into N-methyl-2-pyrrolidone (NMP) (10 mL) with polyvinylidene fluoride (PVDF) (1.2 mg) and Ketjen black (KB) (0.6 mg). The powder sample was deposited on the Celgard-2400 polypropylene (PP) separator followed by drying at 60 °C overnight under a vacuum. Finally, the functionalized separator was cut into the 19 mm diameter discs for further use.

### **Synthesis of the KB@S and CNT/S cathodes**

To obtain Ketjen black (KB)/S composite, sulfur powder ( $\text{S}_8$ ) and KB) were ground together in an 8:2 mass ratio and heated at 155 °C for 12 h using melt diffusion. Afterward, a slurry containing KB/S composite (80 wt.%), KB (10 wt.%), and

polyvinylidene fluoride (PVDF) (10 wt.%) was prepared followed by adding small amounts of NMP and coated on carbon coated aluminum foil drying under vacuum at 60 °C overnight prior to use. The areal sulfur loading with a diameter of 12 mm was around 1.0 mg cm<sup>-2</sup>.

Commercial carbon nanotube (CNT) and sublimed sulfur with a ratio of 1:3 was ground uniformly in a mortar to obtain a CNT/S mixture. The CNT/S mixture was then heated at 155 °C for 12 h to obtain a CNT/S composite. CNT/S cathode slurry was prepared through mixing 80% CNT/S, 10% KB, and 10% PVDF in NMP. The obtained slurry was coated onto the surface of carbon paper and dried at 60 °C for 12 h.

### **Lithium polysulfide (Li<sub>2</sub>S<sub>6</sub>) solution and visualized adsorption test**

Li<sub>2</sub>S<sub>6</sub> solution was prepared by dissolving S<sub>8</sub> and Li<sub>2</sub>S with a molar ratio of 5:1 in 1:1 volume ratio of DOL/DME solvents and stirring at 70 °C for 24 h. The resulting 0.1 M Li<sub>2</sub>S<sub>6</sub> solution was utilized for adsorption test. Certain amount of samples were added into 3 mL Li<sub>2</sub>S<sub>6</sub> solution (5 mM) to observe the color change of the solution.

### **Symmetrical cells assembling and testing**

0.25 M Li<sub>2</sub>S<sub>6</sub> electrolyte was prepared by dissolving S<sub>8</sub> and Li<sub>2</sub>S with a molar ratio of 5:1 in electrolyte (1 M LiTFSI in a mixed solvent of DOL/DME under a volumetric ratio of 1:1) and stirring at 70 °C for 24 h. Mixing active materials (DC/A O-CoVSe NPs and SC/A O-CoVSe NPs) and PVDF were uniformly dispersed in NMP and then coated onto aluminum foil to both serve as anode and cathode. 0.25 M Li<sub>2</sub>S<sub>6</sub> electrolyte was electrolyte and commercial Celgard-2400 polypropylene (PP) was used as the separator. The as-prepared symmetric cells were measured by cyclic voltammetry (CV) at scan rate of 5 mV s<sup>-1</sup> and voltage range from -1.0 to 1.0 V.

### **Li<sub>2</sub>S nucleation measurements**

First, 0.5 M Li<sub>2</sub>S<sub>8</sub> electrolyte was prepared by mixing Li<sub>2</sub>S and sulfur powders at a molar ratio of 1:7 and dissolved into DME and DOL (1:1 in volume) solution with 1.0 M LiTFSI by stirring for 24 h. DC/A O-CoVSe NPs or SC/A O-CoVSe NPs were uniformly dispersed in ethanol and then dropped onto carbon paper to obtain the cathode. For the Li<sub>2</sub>S nucleation, CR 2032 cells were assembled with the commercial PP as separator, and the lithium foil as anode. 20 μL Li<sub>2</sub>S<sub>8</sub> electrolyte was added to the

cathode side, and 20  $\mu\text{L}$  1M LITFSI electrolyte was dropped onto the lithium anode side. The batteries were first discharged to 2.19 V at 0.112 mA followed by maintaining at 2.05 V until the current was below  $1.0 \times 10^{-5}$  A.

### **Materials characterization**

The crystal structure of products was examined by X-ray diffraction (XRD) under Cu Ka radiation source (D/max-Uitima III Rigaku). The surface chemical states of products were detected through X-ray photoelectron spectroscopy (XPS, Thermo Fisher Scientific, ESCALAB 250). The microscopic morphology of products was explored through field-emission scanning electron microscopy (FESEM, Germany, Zeiss Supra 55) and high-resolution transmission electron microscope (HRTEM, FEI, Talos F200i). Simultaneous thermal analyzer (TG-DSC, NETZSCH, STA449-F5) was performed on thermogravimetric analysis (TGA).

### **Electrochemical Characterization**

CR2032 coin batteries were assembled with KB/S or CNT/S cathodes, modified PP separators, and Li foil anodes in the Ar-filled glove box. LiTFSI of 1.0 M in a DME-DOL solution (1:1 in volume) with 1 wt.%  $\text{LiNO}_3$  was used as the electrolyte for lithium-sulfur (Li-S) batteries. The rate and cyclic performances of batteries were measured with a galvanostatic mode at a voltage window of 1.7–2.8 V using Neware battery testing system (Neware, China). Cyclic voltammetry of Li-S batteries was performed on a CHI660 electrochemical station. Electrochemical impedance spectroscopy of batteries was also measured with CHI660 electrochemical station, with the frequency range of  $10^{-2}$ - $10^5$  Hz.

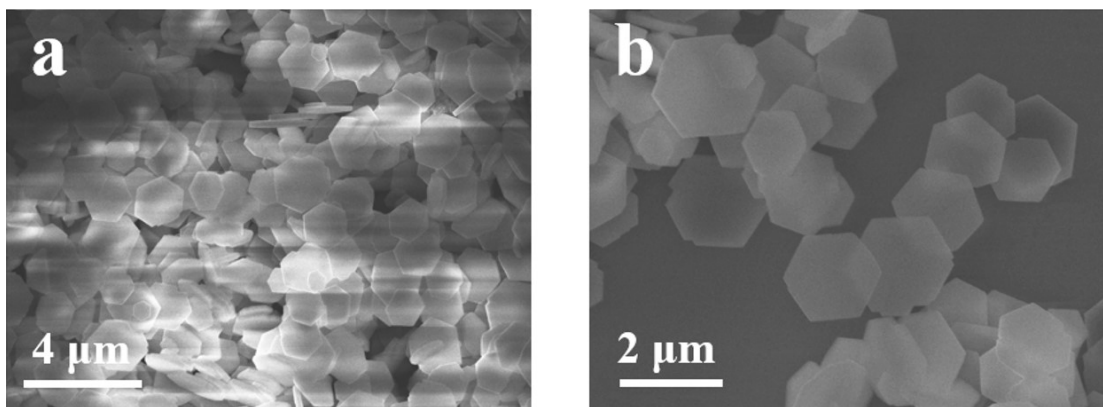

**Figure S1.** (a, b) SEM images of the  $\text{Co}_2\text{V}_2\text{O}_7 \cdot x\text{H}_2\text{O}$  NPs.

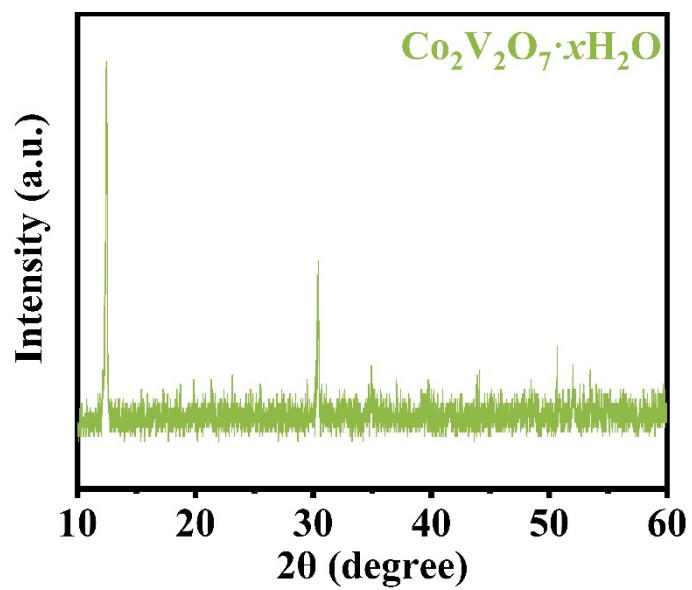

**Figure S2.** XRD pattern of the  $\text{Co}_2\text{V}_2\text{O}_7 \cdot x\text{H}_2\text{O}$  NPs.

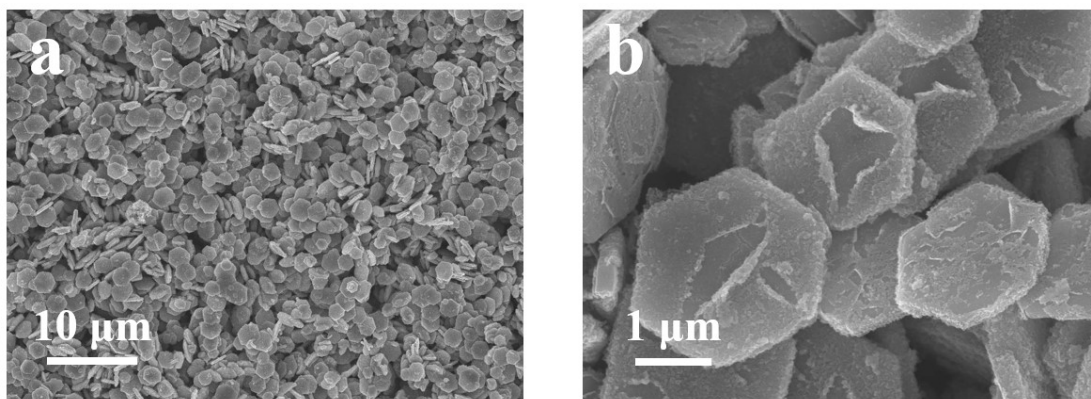

**Figure S3.** (a, b) SEM images of the SC/A O-CoVSe NPs.

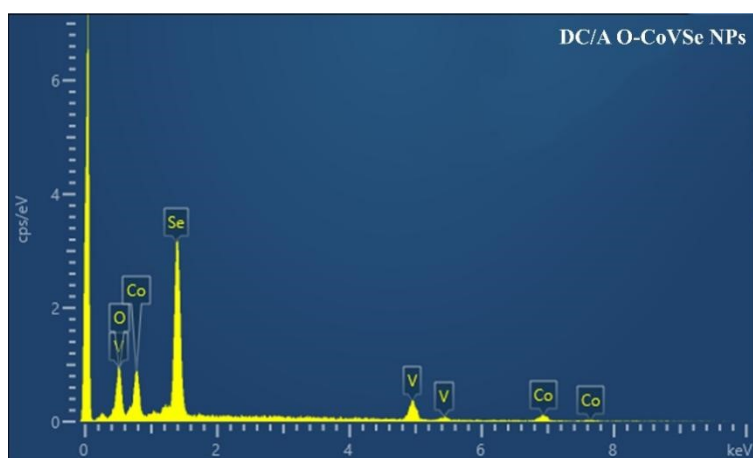

**Figure S4.** EDS spectrum of the DC/A O-CoVSe NPs.

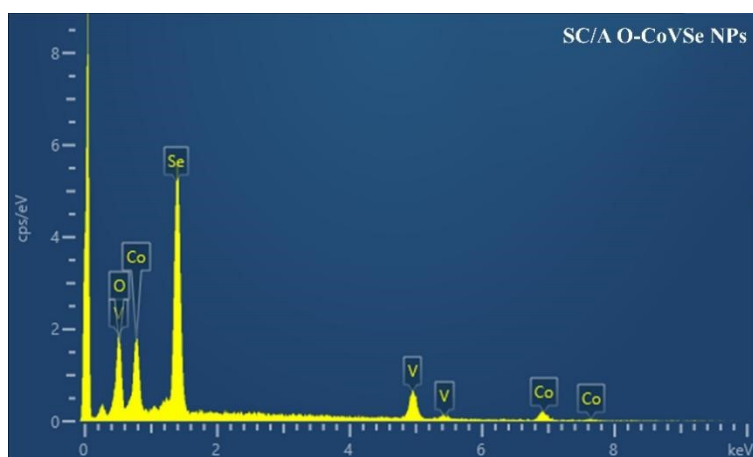

**Figure S5.** EDS spectrum of the SC/A O-CoVSe NPs.

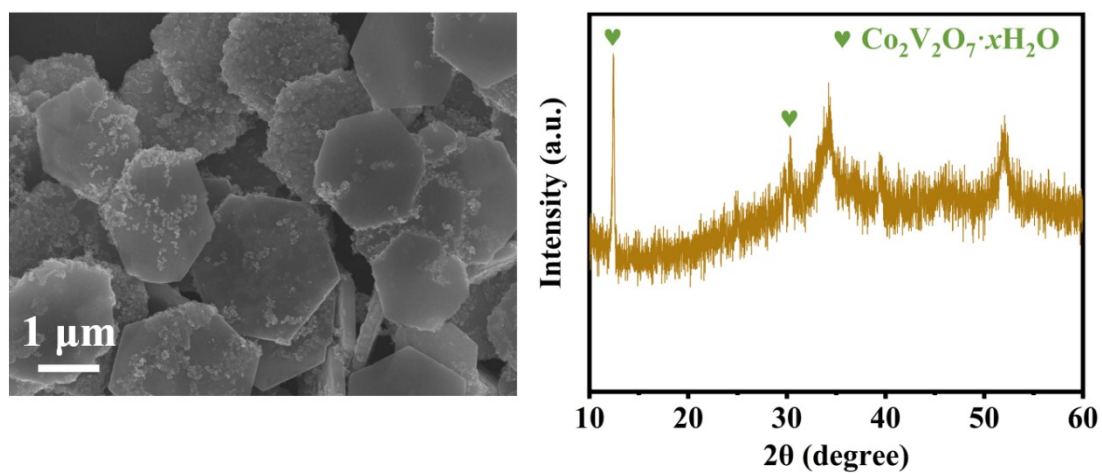

**Figure S6.** SEM image and XRD pattern of the product obtained at 100 °C.

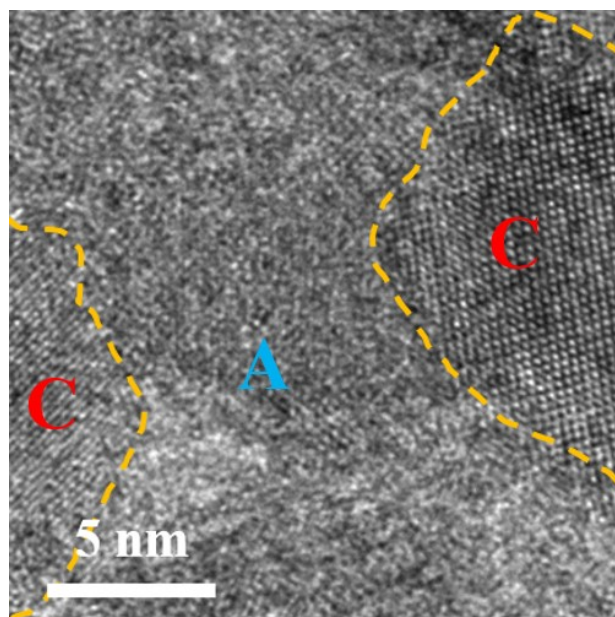

**Figure S7.** HRTEM image of the DC/A O-CoVSe NPs.



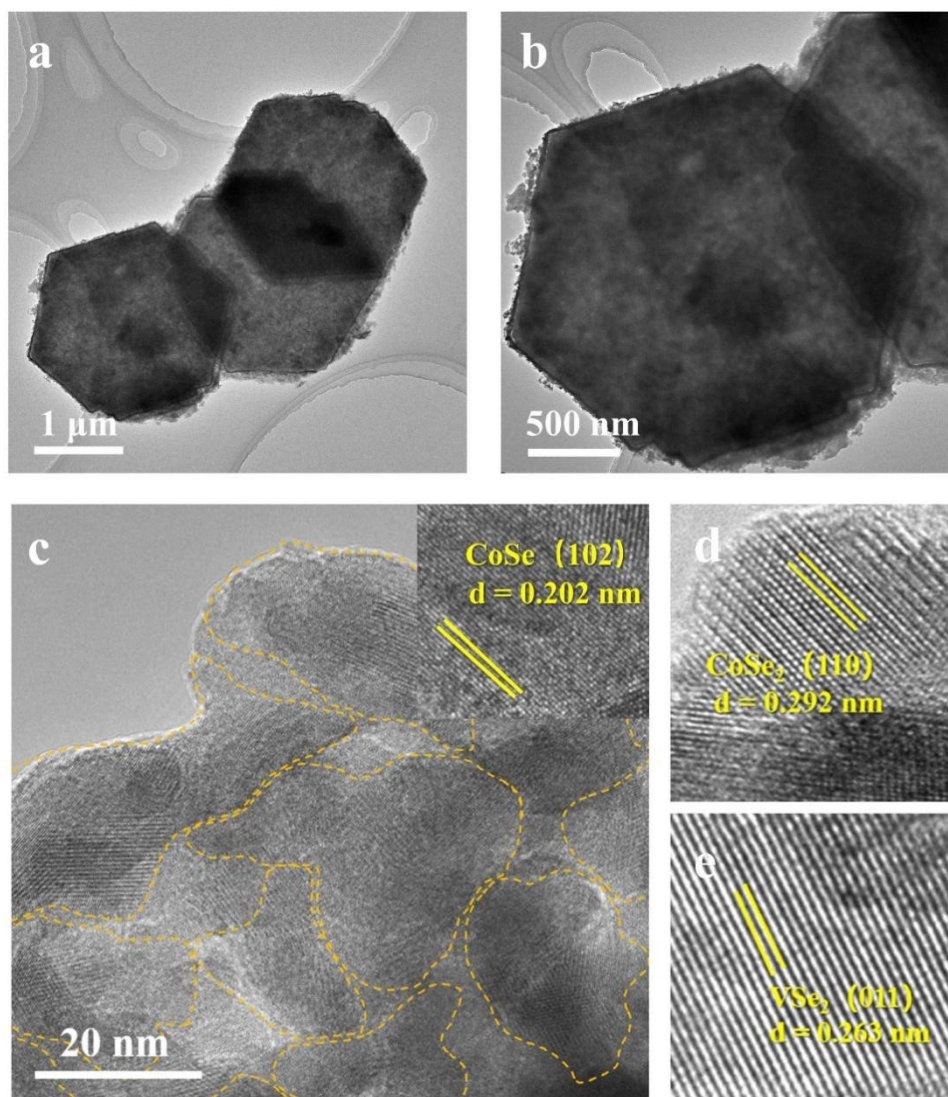

**Figure S8.** TEM and HRTEM images of the SC/A O-CoVSe NPs.



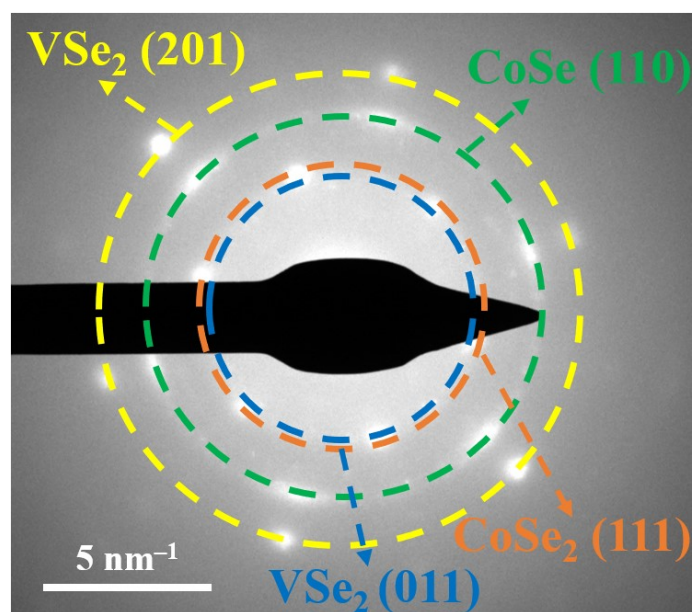

Figure S9. SAED pattern of the SC/A O-CoVSe NPs.

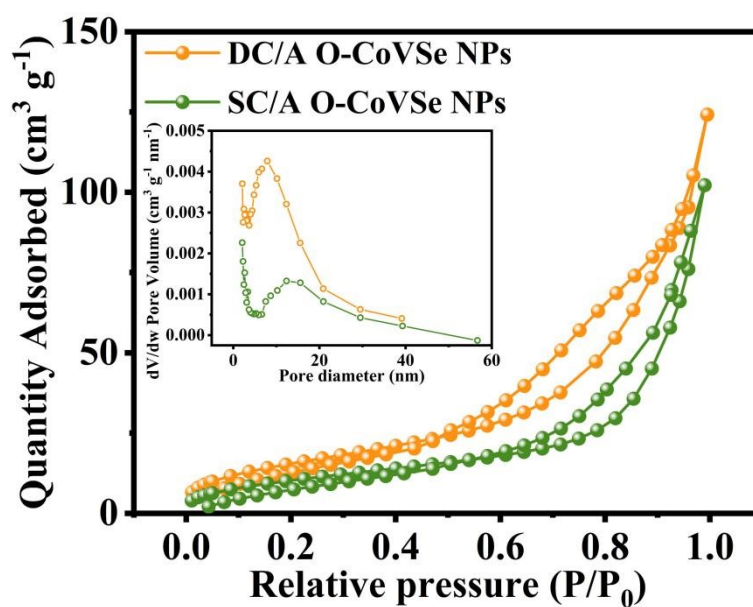

Figure S10.  $N_2$  adsorption-desorption isotherm of the DC/A O-CoVSe NPs and SC/A O-CoVSe NPs (insert shows the size distribution curves).

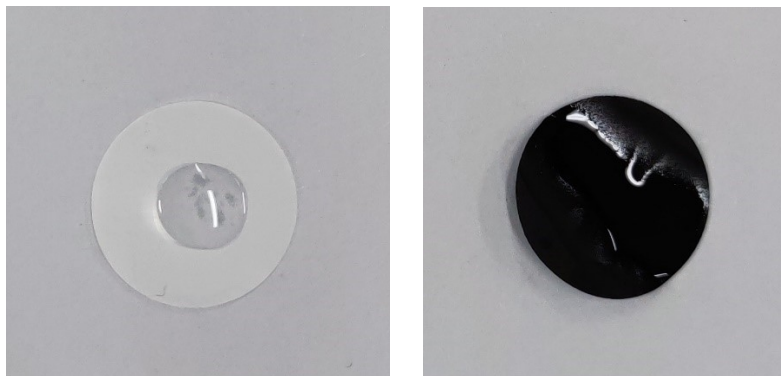

**Figure S11.** The electrolyte wettability test for the PP (left) and DC/A O-CoVSe NPs/PP (right) separators.

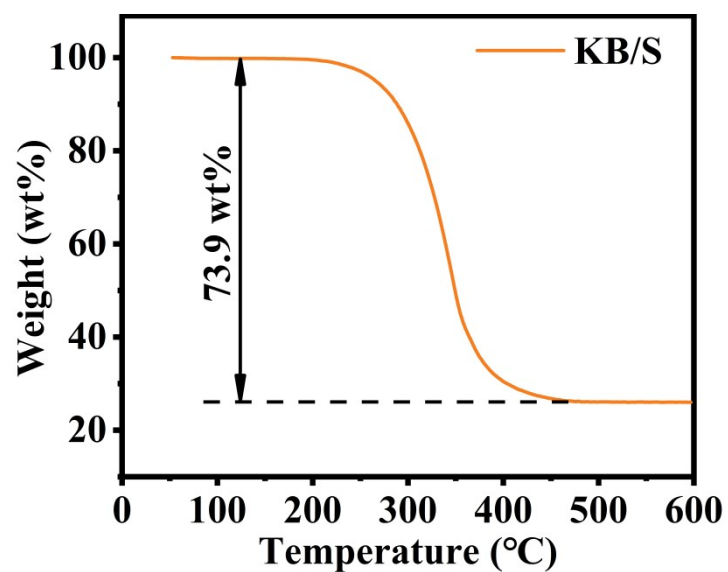

**Figure S12.** TGA curve of the KB/S composite under nitrogen atmosphere.

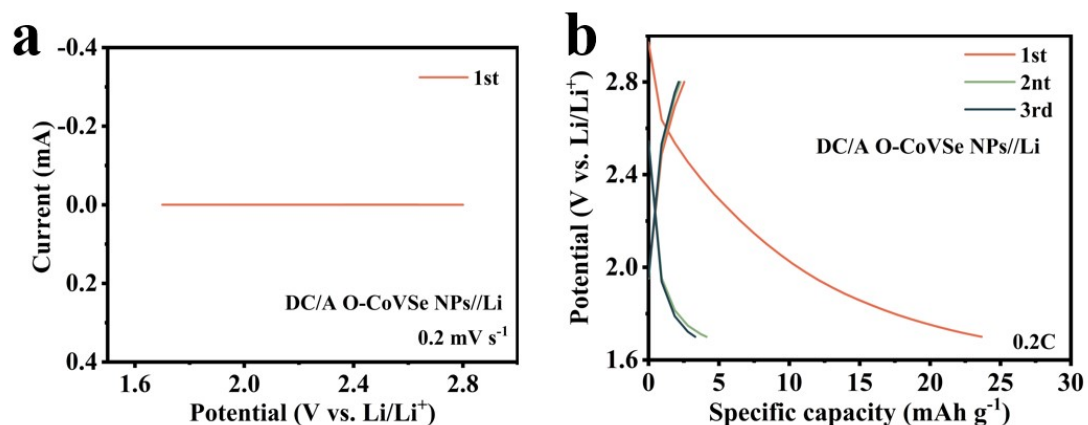

**Figure S13.** (a) CV curve and (b) GCD profiles of the DC/A O-CoVSe NPs//Li cell (without sulfur loading) in the voltage range of 1.7-2.8 V.

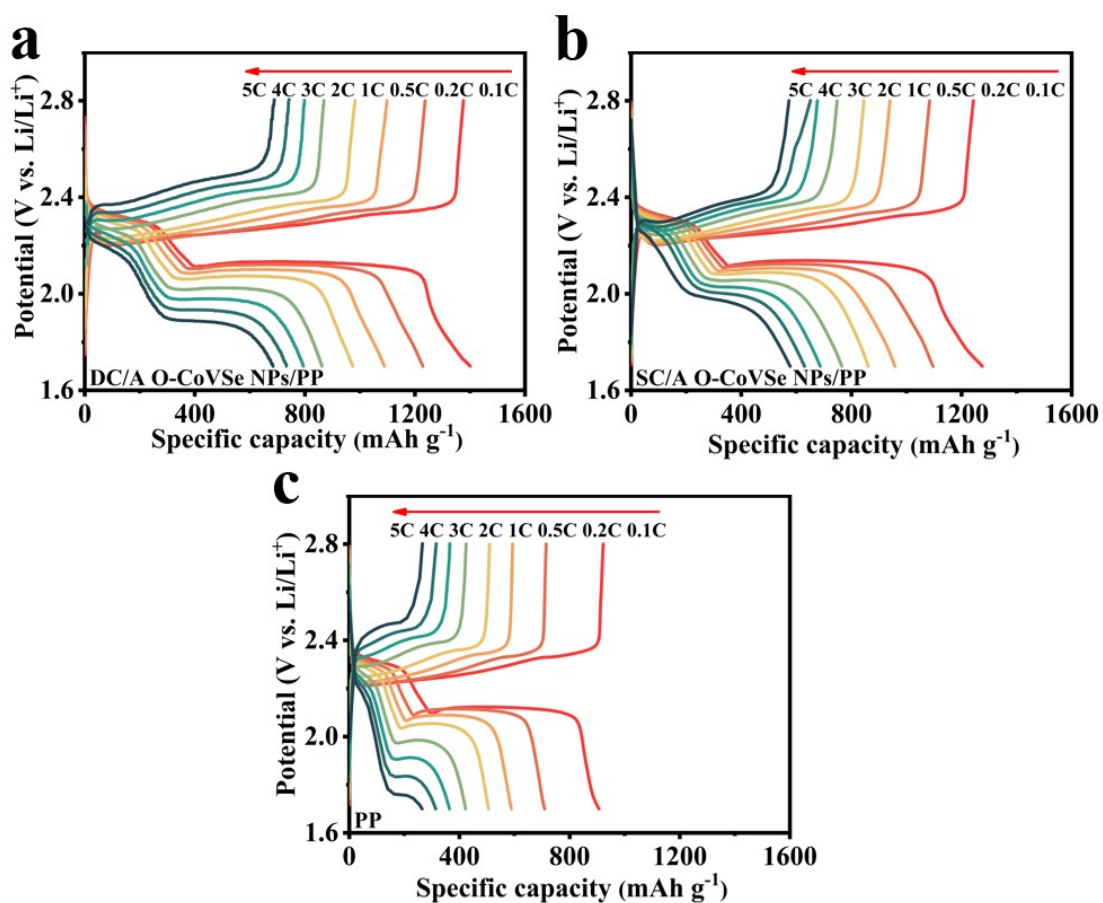

**Figure S14.** GCD profiles of the Li-S batteries with (a) DC/A O-CoVSe NPs/PP, (b) SC/A O-CoVSe NPs/PP and (c) PP separators at different current densities.

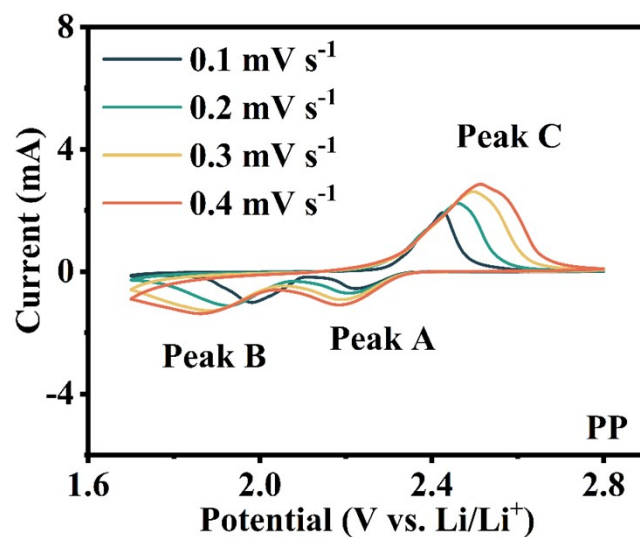

**Figure S15.** CV curves of Li-S battery with PP separator at various scan rates from 0.1 to 0.4  $\text{mV s}^{-1}$ .

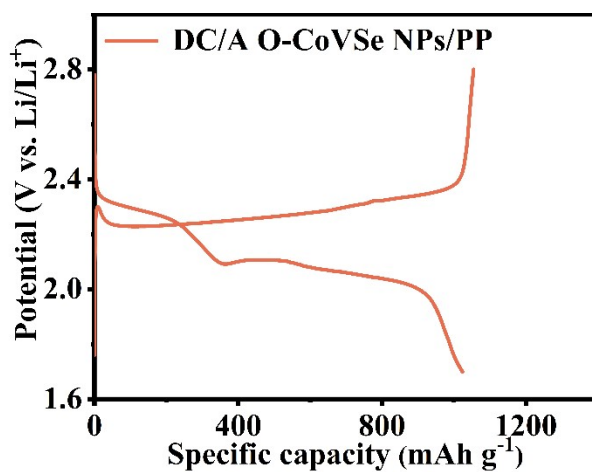

**Figure S16.** GCD profiles of the high-sulfur-loading battery at 0.2C.

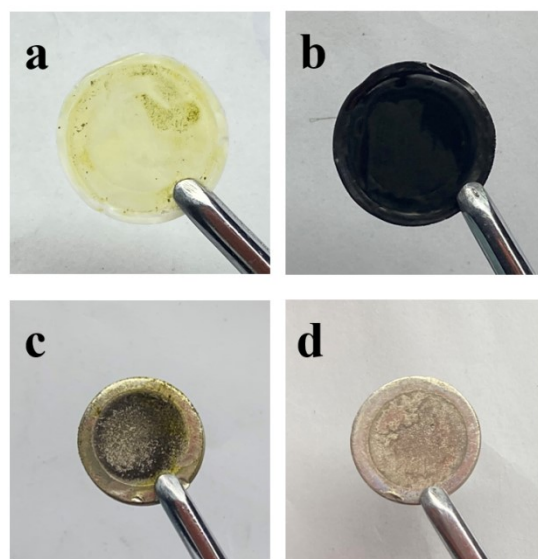

**Figure S17.** Post-mortem analysis of the Li-S battery after 100 cycles. Digital photographs of the (a) PP, (b) DC/A O-CoVSe NPs/PP and (c, d) corresponding lithium metal anodes.

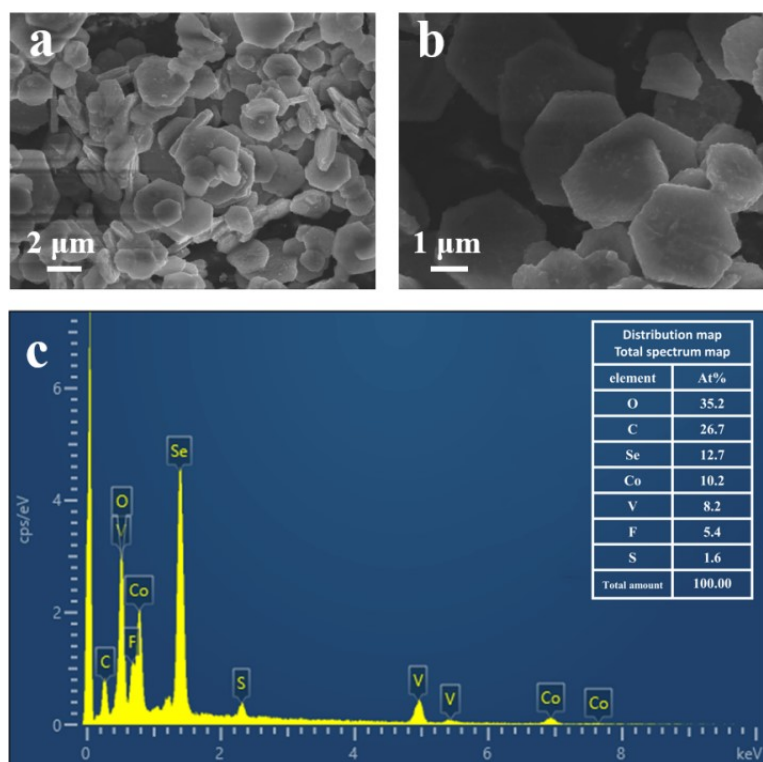

**Figure S18.** (a, b) SEM images and (c) EDS spectrum of the DC/A O-CoVSe NPs/PP after cycling.

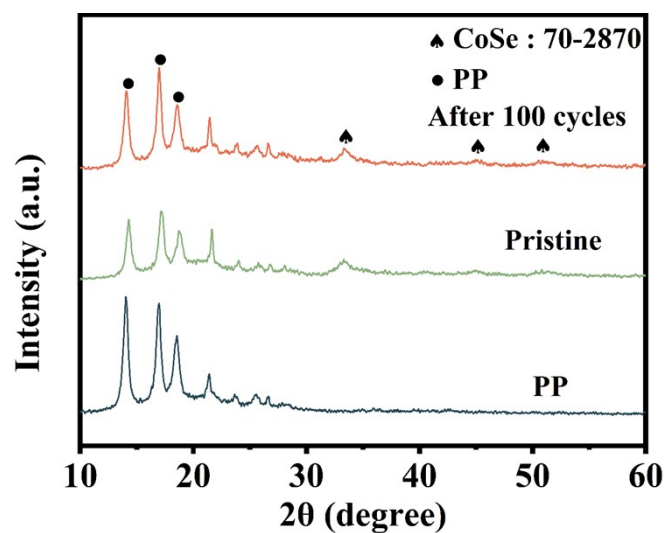

**Figure S19.** XRD patterns of the PP, DC/A O-CoVSe/PP separators before and after cycling.

**Table S1.** Elemental composition of samples according to the ICP and element analysis results:

| Sample           | Co/ atomic% | V/ atomic% | Se/ atomic% |
|------------------|-------------|------------|-------------|
| SC/A O-CoVSe NPs | 34.59       | 27.03      | 38.38       |
| DC/A O-CoVSe NPs | 36.58       | 23.39      | 40.03       |

**Table S2.** Summary of lithium-ion diffusion rates ( $D_{Li^+}$ ,  $\text{cm}^2 \text{s}^{-1}$ ) of different separators:

| Sample              | Peak A                | Peak B                | Peak C                |
|---------------------|-----------------------|-----------------------|-----------------------|
| PP                  | $3.66 \times 10^{-9}$ | $2.16 \times 10^{-9}$ | $1.25 \times 10^{-8}$ |
| SC/A O-CoVSe NPs/PP | $1.79 \times 10^{-8}$ | $1.73 \times 10^{-8}$ | $1.27 \times 10^{-7}$ |
| DC/A O-CoVSe NPs/PP | $6.19 \times 10^{-8}$ | $9.15 \times 10^{-8}$ | $3.67 \times 10^{-7}$ |

**Table S3.** Comparison of the electrochemical properties the modified materials for Li-S batteries.

| Modified materials                                  | Sulfur loading (mg cm <sup>-2</sup> ) | Long cycle Stability (mAh g <sup>-1</sup> ) | Capacity Decay Rate (cycle <sup>-1</sup> ) | Low rate (Initial capacity) mAh g <sup>-1</sup> | High rate (Initial capacity) mAh g <sup>-1</sup> | Ref.      |
|-----------------------------------------------------|---------------------------------------|---------------------------------------------|--------------------------------------------|-------------------------------------------------|--------------------------------------------------|-----------|
| LC-Ni <sub>x</sub> Fe <sub>y</sub> @OCNT/NG         | 2.4                                   | ~490/3C/600                                 | 0.08%                                      | 1379(0.1C)                                      | 855.7(3C)                                        | 36        |
| KB/Mo <sub>2</sub> C                                | 1.2                                   | 439/1C/600                                  | 0.076%                                     | 1299(0.1C)                                      | 437(3.5C)                                        | 54        |
| 3D P-MoS <sub>2</sub> -G                            | 1                                     | 629.4/0.5C/300                              | 0.14%                                      | 1099.7(0.1C)                                    | 667.5(4C)                                        | 55        |
| STO-W/S                                             | 1.2                                   | 541/1C/500                                  | 0.067%                                     | 1242(0.1C)                                      | 492(2C)                                          | 56        |
| Zn <sub>2</sub> W <sub>2</sub> @2CD                 | 1.5                                   | 720/1C/500                                  | 0.064%                                     | 1355(0.1C)                                      | 552(5C)                                          | 57        |
| Ti <sub>3</sub> C <sub>2</sub> T <sub>x</sub>       | 0.9                                   | 535/1C/500                                  | 0.070%                                     | 1282(1C)                                        | 677(2C)                                          | 58        |
| H-CMP                                               | 1.2                                   | 653.1/1C/500                                | 0.0668%                                    | 1216(0.1C)                                      | 770.5(3C)                                        | 59        |
| Bi <sub>2</sub> Te <sub>2.7</sub> Se <sub>0.3</sub> | 4                                     | 560/2C/300                                  | 0.10%                                      | 1284(0.1C)                                      | 756(2C)                                          | 60        |
| CoF <sub>2</sub>                                    | 2                                     | 542.4/1C/300                                | 0.076%                                     | 1096(0.1C)                                      | 737.1(2C)                                        | 61        |
| Co/Mo <sub>2</sub> C                                | 1                                     | 640/1C/600                                  | 0.072%                                     | 1186(0.2C)                                      | 553(4C)                                          | 62        |
| DC/A O-CoVSe NPs                                    | 1                                     | 672.4/1C/500                                | 0.066%                                     | 1400.1(0.1C)                                    | 683.8(5C)                                        | This work |



**Table S4.** Comparison of the areal capacities and sulfur loading with other previously reported Li-S batteries in literatures.

| Modified materials                            | Sulfur loading (mg cm <sup>-2</sup> ) | Areal Capacity (mAh cm <sup>-2</sup> ) | E/S ratio (μL mg <sup>-1</sup> ) | Ref.      |
|-----------------------------------------------|---------------------------------------|----------------------------------------|----------------------------------|-----------|
| MoO <sub>2</sub> -Mo <sub>2</sub> N           | 4                                     | 3.19                                   | 6-7                              | 12        |
| Ni-Co-P@C                                     | 4.5                                   | ~3.4                                   | 5                                | 14        |
| Mo <sub>2</sub> C/CHS                         | 5                                     | 4.52                                   | 7                                | 17        |
| ZnSe-CoSe <sub>2</sub> @NC                    | 6.08                                  | ~2.7                                   | 4.1                              | 19        |
| 7TiN:3TiO <sub>2</sub> -G                     | 4.3                                   | 2.12                                   | Not mentioned                    | 22        |
| CoNiO <sub>2</sub> /Co <sub>4</sub> N         | 3.1                                   | 2.5                                    | 10                               | 24        |
| MoS <sub>2</sub> -MoO <sub>3</sub> /CS        | 5.9                                   | 3.78                                   | Not mentioned                    | 25        |
| Co <sub>7</sub> Mo <sub>3</sub> B             | 4.53                                  | 4.96                                   | 5                                | 33        |
| LC-Ni <sub>x</sub> Fe <sub>y</sub> @OCNT/NG   | 5.37                                  | 4.1                                    | 4.9                              | 36        |
| 3D P-MoS <sub>2</sub> -G                      | 3.7                                   | 4.3                                    | Not mentioned                    | 55        |
| Ti <sub>3</sub> C <sub>2</sub> T <sub>x</sub> | 2.42                                  | 2.4                                    | Not mentioned                    | 58        |
| CoF <sub>2</sub>                              | 4                                     | 2.79                                   | 8                                | 61        |
| DC/A O-CoVSe NPs                              | 5.6                                   | 5.75                                   | 8                                | This work |
